# Supplementary material for: The Role of Innate Immune Cells in the Prediction of Early Renal Allograft Injury Following Kidney Transplantation
Source: MDPI journal article supplement (doi:10.3390/jcm11206148), 2022-10-18
Supplement: s1 [file s1]

## Supplementary Materials

**Table S1.** Frequencies type of induction therapy (with/without ATG) and type of kidney transplantation (living/deceased donor kidney transplantation) with regard to the occurrence of the component endpoint itself (i.e. early renal graft injury (eRGI)), and each single component of the combined endpoint: delayed graft function (DGF), rejection, acute tubular necrosis (ATN), and initial non function (INF).

| Variables | Total<br>(N = 50 pa-<br>tients) | eRGI-<br>(N = 27 pa-<br>tients) | eRGI+<br>(N = 23 pa-<br>tients) | DGF-<br>(N = 33 pa-<br>tients) | DGFI+<br>(N = 17 pa-<br>tients) | Rejection-<br>(N = 41 pa-<br>tients) | Rejection+<br>(N = 9 patients) |
|-----------|---------------------------------|---------------------------------|---------------------------------|--------------------------------|---------------------------------|--------------------------------------|--------------------------------|
| DD + ATG  | 4 (8)                           | 1 (4)                           | 3 (13)                          | 2 (4)                          | 2(12)                           | 1 (2.5)                              | 3 (33)                         |
| DD - ATG  | 31 (62)                         | 14 (52)                         | 17 (74)                         | 18 (54)                        | 13 (78)                         | 25 (61)                              | 6 (64)                         |
| LD + ATG  | 1 (2)                           | 1 (4)                           | 0 (0)                           | 1 (3)                          | 0 (0)                           | 1 (2.5)                              | 0 (0)                          |
| LD - ATG  | 14 (28)                         | 11 (40)                         | 3 (13)                          | 12 (39)                        | 2 (12)                          | 13 (34)                              | 0 (0)                          |
| Variables | ATN -<br>(n = 35 patients)      |                                 | ATN +<br>(n = 15 patients)      |                                | INF – (n = 50)                  |                                      | INF + (n = 0)                  |
| DD+ ATG   | 1 (3)                           |                                 | 3 (26)                          |                                | 4 (8)                           |                                      | 0                              |
| DD- ATG   | 20 (57)                         |                                 | 11 (67)                         |                                | 31 (62)                         |                                      | 0                              |
| LD+ ATG   | 1 (3)                           |                                 | 0 (0)                           |                                | 1 (2)                           |                                      | 0                              |
| LD- ATG   | 13 (27)                         |                                 | 1 (7)                           |                                | 14 (28)                         |                                      | 0                              |

**Table S2.** Uni- and multivariate logistic regression analysis of clinical and immunological predictors for acute (treated) rejection after kidney transplantation.

| Variables                                                        | UVA     | MVA                 |         |
|------------------------------------------------------------------|---------|---------------------|---------|
|                                                                  | p-Value | OR (95%CI)          | p-Value |
| <b>Recipient factors</b>                                         |         |                     |         |
| Recipient age, years                                             | 0.01    | 1.11(1.02-1.21)     | 0.018   |
| Recipient BMI, <25 versus >25                                    | 0.03    | NS                  | NS      |
| Recipient cardiovascular disease (yes versus no)                 | <0.01   | 12.3 (1.9-82.3)     | <0.01   |
| <b>Donor factors</b>                                             |         |                     |         |
| Donor gender (female versus male)                                | 0.08    |                     |         |
| Donor age, years                                                 | 0.02    | 1.009 (1.007-1.012) | 0.03    |
| donor cerebrovascular disease as cause of death (yes versus no); | 0.09    |                     |         |
| Donor type- DD und LD                                            | 0.03    | NS                  | NS      |
| <b>Transplant-related factors</b>                                |         |                     |         |
| Cold ischemia time                                               | 0.05    |                     |         |
| HLA- mismatches >3 versus <3                                     | 0.01    | 1.87 (1.15-3.91)    | 0.01    |
| Delayed graft function                                           | < 0.01  | 2.49 (1.57-3.93)    | 0.03    |
| Number of transplant (re versus first)                           | 0.017   | NS                  | NS      |
| Viral infections (yes versus no)                                 | 0.04    | NS                  | NS      |
| bacterial infections                                             | 0.03    | 8.5 (1.5-46.7)      | 0.019   |
| Average tacrolimus levels, < versus > 8 ng/ml                    | 0.04    | NS                  | NS      |
| <b>Immunological parameters</b>                                  |         |                     |         |
| Neutrophils POD 1; > 12.5 x 10 <sup>3</sup> /ul                  | 0.025   | NS                  |         |
| Neutrophils POD 7; > 9.4 x10 <sup>3</sup> /ul                    | <0.01   | 18.6 (1.49-216.2)   | 0.019   |
| Monocytes POD 3; > 850 cell/ul                                   | 0.03    | NS                  |         |
| Monocytes POD 7; > 1150 cells/ul                                 | 0.023   | 14.5 (1.14-187.61)  | 0.039   |
| NK cells POD 3; < 125 cells/ul                                   | <0.01   | NS                  |         |
| NK cells POD 7; < 91 cells/ul                                    | 0.018   | 10.60 (1.11-110.8)  | 0.031   |

|                                   |       |                   |       |
|-----------------------------------|-------|-------------------|-------|
| Basophils POD 3; < 6.7 cells/ul   | 0.023 | 9.43 (4.87-45.8)  | 0.049 |
| Basophils POD 10; < 18.1 cells/ul | 0.04  | NS                | NS    |
| mDC POD 7; < 4.7 cells/ul         | <0.01 | 22.7 (2.61-198.2) | <0.01 |

**Following variables were tested in univariate analysis but failed to show significance:** Recipient gender, donor body mass index; operating time, warm ischemia time, induction therapy (yes versus no), donor (hypertension, diabetes), dialysis modality (hemodialysis versus peritoneal), pre-emptive transplantation (no versus yes); comorbidities recipient (hypertension, diabetes mellitus; peripheral arterial disease); fungal infections, time on dialysis pretransplant; immunological factors: neutrophils POD 0,3 and 10, monocytes POD 0,1 and 10; NK cells on POD 0, 1 and 10; basophils on POD 0,1, and 7; mDC on POD 0,1,3 and 10; pDC on POD 0,1,3,7 and 10; **Abbreviations:** UVA, univariate analysis; MVA, multivariate analysis; OR, odds ratio; CI, confidence interval; BMI, body mass index; NS, not significant; LD, living donor; DD, deceased donor; mDC, myeloid dendritic cells; pDC, plasmacytoid dendritic cells; POD, postoperative days;

**Table S3.** Uni- and multivariate logistic regression analysis of clinical and immunological predictors for delayed graft function following kidney transplantation.

| Variables                                        | UVA             | MVA                |                 |
|--------------------------------------------------|-----------------|--------------------|-----------------|
|                                                  | <i>p</i> -Value | OR (95%CI)         | <i>p</i> -Value |
| Recipient factors                                |                 |                    |                 |
| Recipient age, years                             | 0.01            | 1.45 (1.15-1.83)   | <0.01           |
| Recipient gender (male versus female)            | 0.06            |                    |                 |
| Recipient BMI, <25 versus >25                    | 0.019           | 1.33 (1.18–1.49)   | <0.01           |
| Recipient cardiovascular disease (yes versus no) | 0.03            | 5.28 (1.15-24.3)   | 0.029           |
| Preemptive transplantation                       | 0.05            | NS                 | NS              |
| Donor factors                                    |                 |                    |                 |
| Donor gender (female versus male)                | 0.01            | 5.9 (1.4-25.6)     | 0.01            |
| Donor age, years                                 | <0.01           | 1.13 (1.04-1.23)   | <0.01           |
| Donor type- DD versus LD                         | <0.01           | 4.1 (1.09-14.8)    | 0.01            |
| Transplant-related factors                       |                 |                    |                 |
| Cold ischemia time                               | <0.01           | 1.006(1.001-1.023) | 0.02            |
| HLA- mismatches > 3 versus <3                    | 0.07            |                    |                 |
| Acute rejection                                  | 0.02            | NS                 | NS              |
| Average tacrolimus levels, > versus < 8 ng/ml    | 0.06            |                    |                 |
| Bacterial infections                             | 0.05            | NS                 | NS              |
| Time on dialyses pretransplant                   | 0.03            | NS                 | NS              |
| Warm ischemia time                               | 0.09            |                    |                 |
| Immunological parameters                         |                 |                    |                 |
| Neutrophils POD 1; > 12.5 x 10^3/ul              | 0.024           | NS                 |                 |
| Neutrophils POD 7; > 9.4 x10^3/ul                | 0.01            | 14.0 (1.54-127.2)  | 0.013           |
| Monocytes POD 1; >725 cells/ul                   | 0.021           | NS                 |                 |
| Monocytes POD 3; >850 cells/ul                   | 0.04            | NS                 |                 |
| Monocytes POD 7; > 1150 cells/ul                 | <0.01           | 23.2 (2.5-311.24)  | <0.01           |
| NK cells POD 1; <177 cells/ul                    | <0.01           | NS                 |                 |
| NK cells POD 3; < 125 cells/ul                   | 0.01            | 5.8 (1.57-29.8)    | 0.019           |
| NK cells POD 7; < 91 cells/ul                    | <0.01           | NS                 |                 |
| Basophils POD 3; > 6.7 cells/ul                  | 0.045           | NS                 |                 |
| Basophils POD 10; < 18.1 cells/ul                | 0.026           | 5.21 (1.4–18.9)    | 0.021           |
| pDC POD 7; < 0.6 cells/ul                        | 0.035           | 19.8 (1.9-216.2)   | <0.01           |
| pDC POD10; <1.0 cells/ul                         | <0.01           | NS                 |                 |
| mDC POD 7; < 4.7 cells/ul                        | 0.03            | 10.5 (1.01-108.5)  | 0.018           |

**Following variables were tested in univariate analysis but failed to show significance:** donor body mass index; operating time; induction therapy (yes versus no), donor (hypertension, diabetes), dialysis modality (hemodialysis versus peritoneal), donor cerebrovascular disease as cause of death (yes versus no); comorbidities recipient (hypertension, diabetes mellitus; peripheral arterial disease); fungal infections; viral infections; waiting time pretransplant; number of transplant (re versus first); immunological factors: neutrophils POD 0,3 and 10, monocytes POD 0 and 10; NK cells on POD 0 ND 10; basophils on POD 0,1 and 7; pDC on POD 0,1, and 3, mDC on POD 0,1,3 and 10. **Abbreviations:** UVA, univariate analysis; MVA, multivariate analysis; OR, odds ratio; CI, confidence interval; BMI, body mass index; NS, not significant; LD, living donor; DD, deceased donor; mDC, myeloid dendritic cells; pDC, plasmacytoid dendritic cells; POD, postoperative days;
